# Supplementary material for: Tumour Angiogenesis in Uveal Melanoma Is Related to Genetic Evolution
Source: MDPI journal article supplement (doi:10.3390/cancers11070979), 2019-07-13
Supplement: s1 [file s1]

**Supplemental Table S5.** Overview of angiogenesis-related genes.

| mRNA   | Name                                          | Locus    | EntrezID | Probe name | Probe number | Remarks                                                                |
|--------|-----------------------------------------------|----------|----------|------------|--------------|------------------------------------------------------------------------|
| VEGF-A | VEGF-A                                        | 6p21.1   | 7422     | VEGFA_p1   | ILMN_2375879 |                                                                        |
| VEGF-B | VEGF-B                                        | 11q13.1  | 7423     | VEGFB_p3   | ILMN_1722855 |                                                                        |
| VEGF-C | VEGF-C                                        | 4q34.3   | 7424     | VEGFC_p1   | ILMN_1701204 |                                                                        |
| HIF1A  | Hypoxia Inducible Factor-1alfa                | 14q23.2  | 3091     | HIF1A_p1   | ILMN_2379788 |                                                                        |
| VHL    | Von Hippel Lindau                             | 3p25.3   | 7428     | VHL_p2     | ILMN_1738579 |                                                                        |
| ANGPT1 | Angiopoietin 1                                | 8q23.1   | 284      | ANGPT1_p1  | ILMN_1677723 |                                                                        |
| ANGPT2 | Angiopoietin 2                                | 8q23.1   | 285      | ANGPT2_p2  | ILMN_1774207 |                                                                        |
| PDGFA  | Platelet-derived Growth Factor-A              | 7p22.3   | 5154     | PDGFA_p1   | ILMN_2342695 |                                                                        |
| CD34   | CD34                                          | 1q32.2   | 947      | CD34_p1    | ILMN_2341229 | Also known as: epithelial cadherin (e-cadherin)<br>Also known as: CD31 |
| CDH1   | Cadherin-1                                    | 16q22.1  | 999      | CDH1_p1    | ILMN_1770940 |                                                                        |
| PECAM1 | Platelet Endothelial Cell Adhesion Molecule 1 | 17q23.3  | 5175     | PECAM1_p1  | ILMN_1689518 |                                                                        |
| VWF    | Von Willebrand Factor                         | 12p13.31 | 7450     | VWF_p1     | ILMN_1752755 |                                                                        |
| CD3D   | CD3                                           | 11q23.3  | 915      | CD3D_p1    | ILMN_2261416 | Lymphocyte marker                                                      |
| CD4    | CD4                                           | 12p13.31 | 920      | CD4_p1     | ILMN_1727284 | Lymphocyte marker                                                      |
| CD8A   | CD8                                           | 2p11.2   | 925      | CD8A_p3    | ILMN_2353732 | Lymphocyte marker                                                      |
| CD68   | CD68                                          | 17p13.1  | 968      | CD68_p1    | ILMN_1714861 | Macrophage marker                                                      |
| CD163  | CD163                                         | 12p13.31 | 9332     | CD163_p2   | ILMN_2379599 | Macrophage marker                                                      |
| BAP1   | BRCA1 Associated Protein1                     | 3p21.1   | 8314     | BAP1_p1    | ILMN_1768363 |                                                                        |
