# Supplementary material for: Tumour Angiogenesis in Uveal Melanoma Is Related to Genetic Evolution
Source: MDPI journal article supplement (doi:10.3390/cancers11070979), 2019-07-13
Supplement: s1 [file s1]

**Supplemental Table S3.** mRNA expression of angiogenesis-related genes in relation to 8q gain and BAP1 loss in 24 and 54 cases, respectively (Leiden data).

|        | BAP1+<br>8q normal      | BAP1+<br>8q gain        |          |   |  | BAP1+<br><i>n</i> = 24 | BAP1-<br><i>n</i> = 30 |          |   |
|--------|-------------------------|-------------------------|----------|---|--|------------------------|------------------------|----------|---|
| mRNA   | <i>n</i> = 11<br>Median | <i>n</i> = 13<br>Median | <i>p</i> |   |  | Median                 | Median                 | <i>p</i> |   |
| VEGF-A | 6.75                    | 6.81                    | 0.125    |   |  | 6.80                   | 6.76                   | 0.651    |   |
| VEGF-B | 8.83                    | 8.66                    | 0.022*   | ↓ |  | 8.74                   | 8.44                   | <0.001*  | ↓ |
| VEGF-C | 6.86                    | 6.62                    | 0.026*   | ↓ |  | 6.76                   | 6.68                   | 0.651    |   |
| HIF1A  | 6.99                    | 7.10                    | 0.087    |   |  | 7.02                   | 7.28                   | <0.001*  | ↑ |
| VHL    | 8.22                    | 8.15                    | 0.284    |   |  | 8.17                   | 7.71                   | 0.003*   | ↓ |
| ANGPT1 | 6.58                    | 6.63                    | 0.931    |   |  | 6.59                   | 6.55                   | 0.508    |   |
| ANGPT2 | 6.42                    | 6.52                    | 0.040*   | ↑ |  | 6.45                   | 6.58                   | 0.015*   | ↑ |
| PDGFA  | 6.94                    | 6.97                    | 0.839    |   |  | 6.96                   | 6.91                   | 0.384    |   |
| CD34   | 6.94                    | 7.24                    | 0.401    |   |  | 7.22                   | 7.37                   | 0.126    |   |
| CDH1   | 9.57                    | 9.82                    | 0.235    |   |  | 9.73                   | 11.58                  | <0.001*  | ↑ |
| PECAM1 | 6.80                    | 6.99                    | 0.140    |   |  | 6.95                   | 7.28                   | 0.004*   | ↑ |
| VWF    | 9.47                    | 9.83                    | 0.839    |   |  | 9.57                   | 9.97                   | 0.013*   | ↑ |
| CD3D   | 6.46                    | 6.67                    | 0.026*   | ↑ |  | 6.59                   | 7.18                   | 0.015*   | ↑ |
| CD4    | 6.41                    | 6.58                    | 0.077    |   |  | 6.53                   | 6.66                   | 0.042*   | ↑ |
| CD8A   | 6.55                    | 6.72                    | 0.125    |   |  | 6.63                   | 7.50                   | 0.016*   | ↑ |
| CD68   | 9.76                    | 10.86                   | 0.007*   | ↑ |  | 10.24                  | 11.23                  | 0.002*   | ↑ |
| CD163  | 6.82                    | 7.31                    | 0.125    |   |  | 7.01                   | 7.19                   | 0.394    |   |
| BAP1   | 7.96                    | 7.95                    | 0.977    |   |  | 7.96                   | 7.26                   | <0.001*  | ↓ |

\**p*-value <0.05. (Abbreviations: BAP1+, BAP1-positive; BAP1-, BAP1-negative; 8q normal, normal chromosome 8q; 8q gain, gain of chromosome 8q)
