# Supplementary material for: Tumour Angiogenesis in Uveal Melanoma Is Related to Genetic Evolution
Source: MDPI journal article supplement (doi:10.3390/cancers11070979), 2019-07-13
Supplement: s1 [file s1]

**Supplemental Table S2.** Patient and tumour characteristics of UM patients with data on tumour genetics and mRNA expression ( $n = 54$ ).

| <b>CATEGORICAL</b>           | <b>Total<br/>Cases (%)</b> |
|------------------------------|----------------------------|
| Gender                       |                            |
| Male                         | 28 (52)                    |
| Female                       | 26 (48)                    |
| Side                         |                            |
| OD                           | 26 (48)                    |
| OS                           | 28 (52)                    |
| TNM stage (8 <sup>th</sup> ) |                            |
| T1                           | 2 (4)                      |
| T2                           | 23 (43)                    |
| T3                           | 27 (50)                    |
| T4                           | 2 (4)                      |
| Pigmentation*                |                            |
| Light                        | 36 (67)                    |
| Dark                         | 17 (32)                    |
| Cell Type                    |                            |
| Spindle                      | 19 (35)                    |
| Mixed + Epithelioid          | 35 (65)                    |
| Ciliary body involvement*    |                            |
| No                           | 32 (59)                    |
| Yes                          | 21 (39)                    |
| Loops and Networks*          |                            |
| None                         | 16 (30)                    |
| Loops+, networks-            | 10 (19)                    |
| Loops+, networks+            | 27 (50)                    |
| Metastasis                   |                            |
| No                           | 23 (43)                    |
| Yes                          | 31 (57)                    |
| Melanoma-Related Death       |                            |
| No                           | 23 (43)                    |
| Yes                          | 31 (57)                    |
| <b>NUMERICAL</b>             | <b>Total</b>               |
| Age – Median                 | 64.0                       |
| LBD – Median                 | 14.0                       |
| Prominence - Median          | 8.0                        |

\*Rows do not add up to 100% due to one missing value.
