# Supplementary material for: Tumour Angiogenesis in Uveal Melanoma Is Related to Genetic Evolution
Source: MDPI journal article supplement (doi:10.3390/cancers11070979), 2019-07-13
Supplement: s1 [file s1]

**Supplemental Table S4.** mRNA expression of angiogenesis-related genes in relation to 8q gain or BAP1 loss in 40 and 40 patients, respectively (TCGA data).

|        | BAP1+<br>8q normal      | BAP1+<br>8q gain        |          |   |  | BAP1+<br><i>n</i> = 40 | BAP1-<br><i>n</i> = 40 |          |   |
|--------|-------------------------|-------------------------|----------|---|--|------------------------|------------------------|----------|---|
| mRNA   | <i>n</i> = 17<br>Median | <i>n</i> = 23<br>Median | <i>p</i> |   |  | Median                 | Median                 | <i>p</i> |   |
| VEGF-A | 7.67                    | 8.23                    | 0.151    |   |  | 8.12                   | 8.64                   | 0.001*   | ↑ |
| VEGF-B | 12.90                   | 13.07                   | 0.503    |   |  | 12.96                  | 12.17                  | <0.001*  | ↓ |
| VEGF-C | 6.49                    | 5.27                    | 0.069    |   |  | 5.36                   | 6.24                   | 0.059    |   |
| HIF1A  | 10.05                   | 9.21                    | 0.061    |   |  | 9.69                   | 10.27                  | 0.002*   | ↑ |
| VHL    | 8.49                    | 7.95                    | 0.176    |   |  | 8.27                   | 7.91                   | 0.023*   | ↓ |
| ANGPT1 | 1.89                    | 1.76                    | 0.519    |   |  | 1.76                   | 2.69                   | 0.022*   | ↑ |
| ANGPT2 | 4.33                    | 4.75                    | 0.159    |   |  | 4.62                   | 5.62                   | <0.001*  | ↑ |
| PDGFA  | 9.97                    | 9.08                    | 0.002*   | ↓ |  | 9.43                   | 9.83                   | 0.006*   | ↑ |
| CD34   | 8.09                    | 8.09                    | 0.753    |   |  | 8.09                   | 8.10                   | 0.665    |   |
| CDH1   | 12.43                   | 12.41                   | 0.880    |   |  | 12.42                  | 14.06                  | <0.001*  | ↑ |
| PECAM1 | 7.27                    | 7.44                    | 0.712    |   |  | 7.35                   | 7.95                   | <0.001*  | ↑ |
| VWF    | 11.10                   | 11.23                   | 0.753    |   |  | 11.16                  | 10.95                  | 0.651    |   |
| CD3D   | 1.37                    | 2.33                    | 0.924    |   |  | 1.88                   | 4.18                   | <0.001*  | ↑ |
| CD4    | 8.76                    | 9.24                    | 0.082    |   |  | 9.02                   | 9.19                   | 0.810    |   |
| CD8A   | 3.87                    | 3.02                    | 0.359    |   |  | 3.37                   | 6.23                   | <0.001*  | ↑ |
| CD68   | 10.95                   | 12.07                   | <0.001*  | ↑ |  | 11.68                  | 11.98                  | 0.149    |   |
| CD163  | 7.50                    | 7.02                    | 0.159    |   |  | 7.14                   | 7.69                   | 0.149    |   |
| BAP1   | 11.97                   | 12.28                   | 0.136    |   |  | 12.09                  | 9.71                   | <0.001*  | ↓ |

\**p*-value <0.05. (Abbreviations: BAP1+, BAP1-positive; BAP1-, BAP1-negative; 8q normal, normal chromosome 8q; 8q gain, gain of chromosome 8q)
