# Supplementary material for: Tumour Angiogenesis in Uveal Melanoma Is Related to Genetic Evolution
Source: MDPI journal article supplement (doi:10.3390/cancers11070979), 2019-07-13
Supplement: s1 [file s1]

**Supplemental Table S1.** Patient and tumour characteristics of UM patients with data on MVD and mRNA expression ( $n = 28$ ).

| <b>CATEGORICAL</b>           | <b>Total<br/>Cases (%)</b> |
|------------------------------|----------------------------|
| Gender                       |                            |
| Male                         | 15 (54)                    |
| Female                       | 13 (46)                    |
| Side                         |                            |
| OD                           | 14 (50)                    |
| OS                           | 14 (50)                    |
| TNM stage (8 <sup>th</sup> ) |                            |
| T1                           | 4 (14)                     |
| T2                           | 9 (32)                     |
| T3                           | 15 (54)                    |
| Pigmentation                 |                            |
| Light                        | 22 (79)                    |
| Dark                         | 6 (21)                     |
| Cell Type                    |                            |
| Spindle                      | 10 (36)                    |
| Mixed + Epithelioid          | 18 (64)                    |
| Ciliary body involvement     |                            |
| No                           | 16 (57)                    |
| Yes                          | 12 (43)                    |
| Loops and Networks           |                            |
| None                         | 7 (25)                     |
| Loops+, networks-            | 5 (18)                     |
| Loops+, networks+            | 16 (57)                    |
| Metastasis                   |                            |
| No                           | 14 (50)                    |
| Yes                          | 14 (50)                    |
| Melanoma-Related Death       |                            |
| No                           | 14 (50)                    |
| Yes                          | 14 (50)                    |
| <b>NUMERICAL</b>             |                            |
| Age – Median                 | 68.9                       |
| LBD – Median                 | 14.5                       |
| Prominence - Median          | 7.0                        |
